# Supplementary material for: Disruption of c-Kit Signaling in KitW-sh/W-sh Growing Mice Increases Bone Turnover
Source: PubMed Central journal article supplement (PMC4985756; doi:10.1038/srep31515), 2016-08-16
Supplement: srep31515-s1.pdf [file srep31515-s1.pdf]

# Disruption of c-*Kit* Signaling in *Kit*<sup>W-sh/W-sh</sup> Growing Mice Increases Bone Turnover

Sutada Lotinun<sup>1,2\*</sup> & Nateetip Krishnamra<sup>3</sup>

<sup>1</sup>Department of Physiology and STAR on Craniofacial and Skeletal Disorders, Faculty of Dentistry, Chulalongkorn University, Bangkok, Thailand

<sup>2</sup>Department of Oral Medicine, Infection and Immunity, Harvard School of Dental Medicine, Boston, MA, USA

<sup>3</sup>Department of Physiology, Faculty of Science, Mahidol University, Bangkok, Thailand

\*Address correspondence to:

Sutada Lotinun, Ph.D.  
Department of Physiology  
Faculty of Dentistry  
Chulalongkorn University  
Bangkok, Thailand  
Email: sutada.l@chula.ac.th

Table S1.  $\mu$ CT analysis of 6-wk-old male  $W/W^r$  mice and their control littermates

| Parameters                                      | WT<br>(n=7) | $W/W^r$<br>(n=7) |
|-------------------------------------------------|-------------|------------------|
| <u>Cortical Bone</u> (midshaft femur)           |             |                  |
| Total cross-sectional volume (mm <sup>3</sup> ) | 1.16±0.03   | 0.92±0.02*       |
| Cortical volume (mm <sup>3</sup> )              | 0.49±0.01   | 0.38±0.01*       |
| Marrow volume (mm <sup>3</sup> )                | 0.42±0.00   | 0.41±0.01        |
| Cortical thickness (mm)                         | 0.173±0.004 | 0.148±0.004*     |
| <u>Cancellous Bone</u> (distal femur)           |             |                  |
| BV/TV (-)                                       | 0.21±0.01   | 0.11±0.01*       |
| Tb.Th (mm)                                      | 0.039±0.000 | 0.035±0.002*     |
| Tb.N (/mm)                                      | 6.35±0.13   | 3.69±0.29*       |
| Tb.Sp (mm)                                      | 0.16±0.00   | 0.29±0.03*       |
| Conn.D (/mm <sup>3</sup> )                      | 613±38      | 398±24*          |
| SMI (-)                                         | 1.19±0.11   | 1.80±0.08*       |

Results are mean ± SEM

\* $p < 0.05$  compared with WT, unpaired  $t$  test

Table S2.  $\mu$ CT analysis of 6-, 9- and 13-wk-old male  $W^{sh}/W^{sh}$  mice and their control littermates

| Parameters                                      | 6-week-old  |                          | 9-week-old  |                          | 13-week-old |                          |
|-------------------------------------------------|-------------|--------------------------|-------------|--------------------------|-------------|--------------------------|
|                                                 | WT<br>(n=6) | $W^{sh}/W^{sh}$<br>(n=7) | WT<br>(n=8) | $W^{sh}/W^{sh}$<br>(n=7) | WT<br>(n=4) | $W^{sh}/W^{sh}$<br>(n=7) |
| <u>Cortical Bone</u> (midshaft tibia)           |             |                          |             |                          |             |                          |
| Total cross-sectional volume (mm <sup>3</sup> ) | 0.52±0.02   | 0.44±0.01*               | 0.70±0.02   | 0.70±0.01                | 0.69±0.06   | 0.70±0.03                |
| Cortical volume (mm <sup>3</sup> )              | 0.27±0.01   | 0.24±0.01*               | 0.42±0.01   | 0.42±0.01                | 0.42±0.03   | 0.42±0.02                |
| Marrow volume (mm <sup>3</sup> )                | 0.24±0.01   | 0.21±0.01*               | 0.28±0.01   | 0.28±0.01                | 0.27±0.03   | 0.27±0.01                |
| Cortical thickness (mm)                         | 0.161±0.003 | 0.151±0.004              | 0.221±0.003 | 0.215±0.004              | 0.221±0.005 | 0.227±0.006              |
| <u>Cancellous Bone</u> (proximal tibia)         |             |                          |             |                          |             |                          |
| BV/TV (-)                                       | 0.11±0.01   | 0.08±0.01*               | 0.18±0.01   | 0.14±0.01*               | 0.14±0.01   | 0.14±0.02                |
| Tb.Th (mm)                                      | 0.032±0.001 | 0.029±0.001              | 0.044±0.001 | 0.038±0.001*             | 0.040±0.001 | 0.043±0.001              |
| Tb.N (/mm)                                      | 4.53±0.14   | 3.59±0.07*               | 5.77±0.06   | 5.19±0.12*               | 5.07±0.08   | 4.62±0.36                |
| Tb.Sp (mm)                                      | 0.22±0.01   | 0.28±0.01*               | 0.16±0.00   | 0.18±0.01*               | 0.19±0.00   | 0.22±0.03                |
| Conn.D (/mm <sup>3</sup> )                      | 297±31      | 214±19*                  | 295±8       | 256±13*                  | 187±14      | 173±20                   |
| SMI (-)                                         | 2.14±0.12   | 2.30±0.08                | 1.83±0.07   | 1.87±0.05                | 1.91±0.19   | 1.67±0.08                |

Results are mean ± SEM

\* $p$ <0.05 compared with corresponding WT, unpaired  $t$  test

Table S3. Histomorphometric analysis of tibiae from 6-, 9- and 13-week-old male  $W^{sh}/W^{sh}$  mice and their control littermates

| Parameters                                      | 6-week-old  |                          | 9-week-old  |                          | 13-week-old |                          |
|-------------------------------------------------|-------------|--------------------------|-------------|--------------------------|-------------|--------------------------|
|                                                 | WT<br>(n=7) | $W^{sh}/W^{sh}$<br>(n=7) | WT<br>(n=7) | $W^{sh}/W^{sh}$<br>(n=7) | WT<br>(n=7) | $W^{sh}/W^{sh}$<br>(n=7) |
| BV/TV (%)                                       | 9.76±0.77   | 6.68±1.13*               | 9.72±0.84   | 10.31±0.74               | 9.99±1.30   | 10.74±0.63               |
| Tb.Th (µm)                                      | 32.47±1.07  | 30.77±1.79               | 32.59±2.20  | 34.30±1.43               | 33.96±2.15  | 35.50±1.23               |
| Tb.N (/mm)                                      | 3.00±0.20   | 2.16±0.33*               | 2.98±0.15   | 3.00±0.15                | 2.89±0.24   | 3.02±0.12                |
| Tb.Sp (µm)                                      | 312±28      | 494±81*                  | 308±17      | 304±17                   | 325±29      | 299±14                   |
| MS/BS (%)                                       | 25.53±1.01  | 29.14±2.09               | 35.24±1.96  | 36.67±1.78               | 28.73±3.47  | 31.78±2.99               |
| MAR (µm/day)                                    | 2.11±0.07   | 2.41±0.08*               | 1.54±0.08   | 2.07±0.08*               | 1.34±0.11   | 1.46±0.06                |
| BFR/BS (µm <sup>3</sup> /µm <sup>2</sup> /year) | 196±11      | 256±19*                  | 197±11      | 278±20*                  | 136±13      | 173±23                   |
| BFR/BV (%/year)                                 | 1129±79     | 1552±115*                | 1069±71     | 1570±83*                 | 786±73      | 979±115                  |
| BFR/TV (%/year)                                 | 115±12      | 108±17                   | 124±8       | 165±10*                  | 79±7        | 96±12                    |
| Ob.S/BS (%)                                     | 8.73±0.72   | 16.06±2.85*              | 11.13±1.10  | 9.21±1.12                | 3.05±0.54   | 3.30±0.60                |
| N.Ob/T.Ar (/mm <sup>2</sup> )                   | 38.03±2.41  | 53.90±10.19              | 52.33±6.87  | 40.35±4.15               | 14.36±2.15  | 15.97±3.16               |
| N.Ob/B.Pm (/mm)                                 | 6.54±0.62   | 12.90±1.76*              | 8.63±0.71   | 6.89±0.85                | 2.57±0.47   | 2.61±0.48                |
| OV/TV (%)                                       | 0.032±0.009 | 0.113±0.035*             | 0.083±0.036 | 0.057±0.019              | 0.017±0.004 | 0.022±0.003              |
| OS/BS (%)                                       | 2.14±0.73   | 6.38±1.27*               | 3.84±1.11   | 3.57±1.12                | 1.23±0.27   | 1.46±0.25                |
| O.Th (µm)                                       | 2.78±0.30   | 4.05±0.47*               | 3.06±0.20   | 2.68±0.16                | 2.39±0.22   | 2.75±0.39                |
| Oc.S/BS (%)                                     | 4.60±0.21   | 7.63±1.31*               | 1.61±0.41   | 5.21±0.96*               | 1.02±0.32   | 2.08±0.36*               |
| N.Oc/T.Ar (/mm <sup>2</sup> )                   | 9.68±0.93   | 10.50±1.04               | 3.52±0.91   | 11.54±2.22*              | 2.30±0.69   | 4.38±0.88                |
| N.Oc/B.Pm (/mm)                                 | 1.60±0.08   | 2.65±0.40*               | 0.57±0.14   | 1.88±0.33*               | 0.39±0.12   | 0.72±0.13                |
| ES/BS (%)                                       | 1.66±0.15   | 2.69±0.52                | 0.77±0.32   | 1.47±0.39                | 0.38±0.07   | 0.75±0.14*               |

Results are mean ± SEM

\* $p < 0.05$  compared with corresponding WT, unpaired  $t$  test

Table S4. Histomorphometric analysis of tibiae from 6-week-old female  $W^{sh}/W^{sh}$  mice and control littermates

| Parameters                                      | 6-week-old  |                          |
|-------------------------------------------------|-------------|--------------------------|
|                                                 | WT<br>(n=7) | $W^{sh}/W^{sh}$<br>(n=7) |
| BV/TV (%)                                       | 5.50±0.80   | 5.37±0.92                |
| Tb.Th (µm)                                      | 30.33±2.03  | 28.36±1.93               |
| Tb.N (/mm)                                      | 1.76±0.19   | 1.89±0.29                |
| Tb.Sp (µm)                                      | 584±77      | 620±139                  |
| MS/BS (%)                                       | 29.37±1.81  | 28.51±1.99               |
| MAR (µm/day)                                    | 1.75±0.12   | 2.55±0.16*               |
| BFR/BS (µm <sup>3</sup> /µm <sup>2</sup> /year) | 190±24      | 266±25*                  |
| BFR/BV (%/year)                                 | 1232±139    | 1931±136*                |
| BFR/TV (%/year)                                 | 66±9        | 94±13                    |
| Ob.S/BS (%)                                     | 12.87±1.34  | 20.20±1.74*              |
| N.Ob/T.Ar (/mm <sup>2</sup> )                   | 30.61±3.15  | 58.51±6.09*              |
| N.Ob/B.Pm (/mm)                                 | 9.09±0.95   | 16.69±1.69*              |
| OV/TV (%)                                       | 0.050±0.010 | 0.090±0.014*             |
| OS/BS (%)                                       | 5.65±1.10   | 8.47±1.34                |
| O.Th (µm)                                       | 2.67±0.16   | 3.26±0.30                |
| Oc.S/BS (%)                                     | 5.18±0.68   | 8.46±1.09*               |
| N.Oc/T.Ar (/mm <sup>2</sup> )                   | 6.35±1.10   | 10.55±1.03*              |
| N.Oc/B.Pm (/mm)                                 | 1.82±0.27   | 3.16±0.46*               |
| ES/BS (%)                                       | 2.28±0.49   | 4.51±1.02                |

Results are mean ± SEM

\* $p < 0.05$  compared with WT, unpaired  $t$  test

Table S5. Sequences of oligonucleotides for qPCR analysis

| Gene                      | Forward primer            | Reverse primer            |
|---------------------------|---------------------------|---------------------------|
| Osteocalcin               | GCTGCCCTAAAGCCAAACTCT     | AGAGGACAGGGAGGATCAAGTTC   |
| Osterix                   | CCCTTCTCAAGCACCAATGG      | AAGGGTGGGTAGTCATTTGCATA   |
| Bsp                       | TGGCGACACTTACCCAGCTT      | CCATGCCCTTGTAGTAGCTGTA    |
| Alp                       | CTTGACTGTGGTACTGCTGATCA   | GTATCCACCGAATGTGAAAACGT   |
| Type I collagen           | CCCAAGGAAAAGAAGCACGTC     | ACATTAGGCGCAGGAAGGTCA     |
| Osteopontin               | CTCCAATCGTCCCTACAGTCG     | CCAAGCTATCACCTCGGCC       |
| Runx2                     | AGTCCCAACTTCCTGTGCTCC     | CGGTAACCACAGTCCCATCTG     |
| Sost                      | ATCATTTCAGACACCTCTTAC     | ATGTGCTTCTGTTACAAACGCTC   |
| Dmp1                      | ATGACTGTCAGGACGGCTAC      | AGTTATAGTGA ACTCTCTAC     |
| RANKL                     | CAAGCTCCGAGCTGGTGAAG      | CCTGAACTTTGAAAGCCCCA      |
| OPG                       | AAGAGCAAACCTTCCAGCTGC     | CACGCTGCTTTCACAGAGGTC     |
| M-CSF                     | ACCTGTTTCCCAAGAAGAGAGCCT  | AGCTGTCAACACAAGCAGCCAAAG  |
| Calcitonin receptor (CTR) | GTGCTCCTCGGGCTGTAGC       | GAGGATTCCGTGGTTCCTGAT     |
| c-Fms                     | TGGCATCTGGCTTAAGGTGAA     | GAATCCGCACCAGCTTGCTA      |
| Nfatc1                    | AGGCTGGTCTTCCGAGTTCA      | ACCGCTGGGAACACTCGAT       |
| Ctsk                      | AGGCATTGACTCTGAAGATGCT    | TCCCCACAGGAATCTCTCTG      |
| RANK                      | ATGAGTACACGGACCGGCC       | GCTGGATTAGGAGCAGTGAACC    |
| TRAP                      | GATCCCTCTGTGCGACATCA      | CCAGGGAGTCCTCAGATCCA      |
| Efnb2                     | TCTGTGTCATCGGTTGGCTACGTT  | ACAGACGCACAGGACACTTCTCAA  |
| Sphk1                     | TGAGGTGGTGAATGGGCTAATGGA  | AACAGCAGTGTGCAGTTGATGAGC  |
| Sphk2                     | TGGGCTGTCCTTCAACCTCATACA  | AGTGACAATGCCTTCCC ACTCACT |
| BMP6                      | AGAAGGGCACTCTTTCAGGTTCCA  | TCACACCACCGAGAGTCAACACAA  |
| Cthrc1                    | CCCATCGAAGCCATCATCTATC    | CAATCCCTTACAGAGTCCTTC     |
| Sema4D                    | TCCGCCTTGACTGTCCATGAAAGA  | ACACGGTGAGCGAGAAACAAATGC  |
| Wnt10b                    | AGGCTTCTCCTTCCGTTCAAGTTGT | ATTCCCACCCTTCTGCTGAAGAA   |
| GAPDH                     | TGCACCACCAACTGCTTAG       | GGATGCAGGGATGATGTTC       |
